# Supplementary figures and images for: Unique molecular events during reprogramming of human somatic cells to induced pluripotent stem cells (iPSCs) at naïve state
Source: eLife journal article supplement (doi:10.7554/elife.29518), 2018-01-30

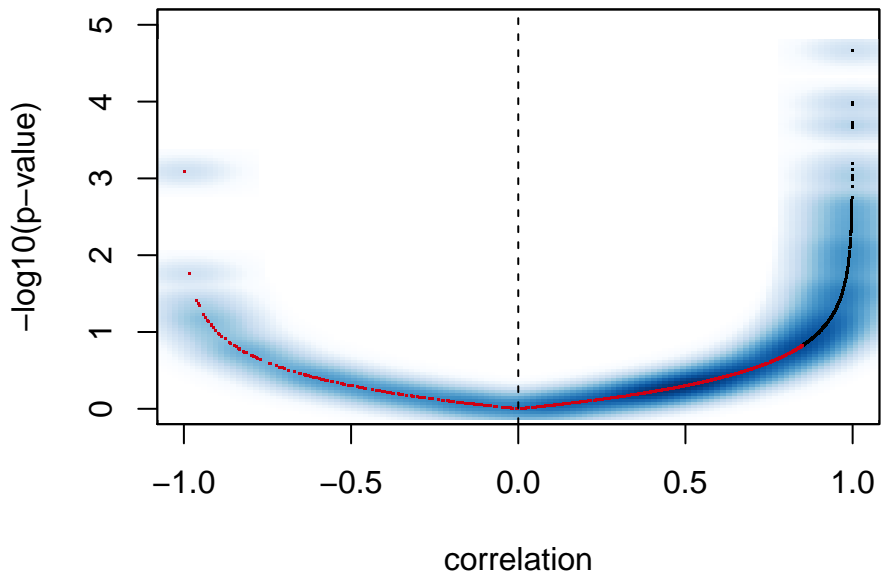

Supplement: supp [file naive.K4me3.expression.correlation.pdf › Source Data/Expression data/Fig6A/naive.K4me3.expression.correlation.pdf]

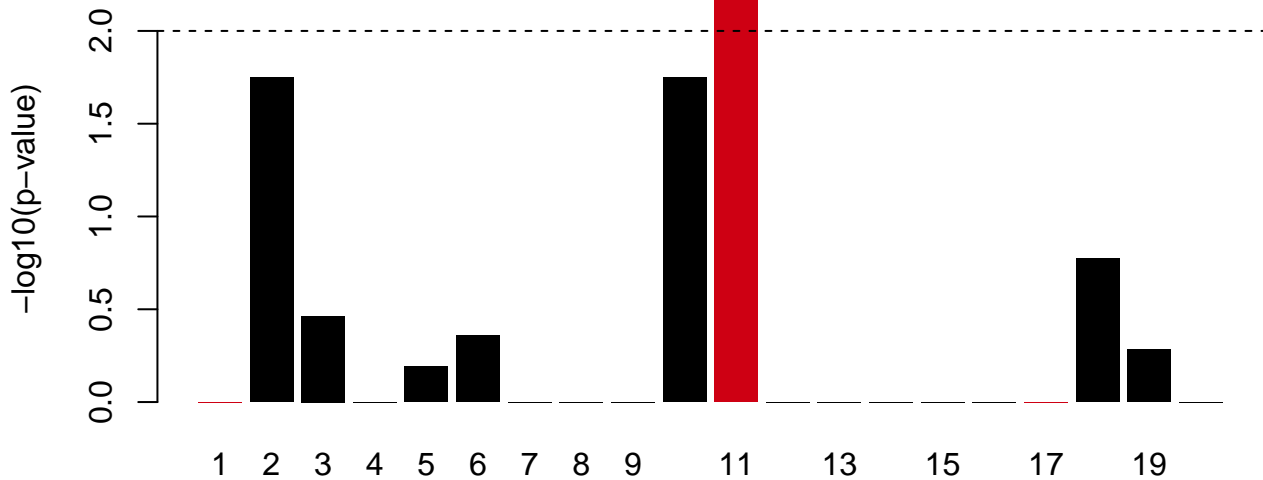

Supplement: supp [file naive.K4me3.negative.gene.pvalue.pdf › Source Data/Expression data/Fig6A/naive.K4me3.negative.gene.pvalue.pdf]

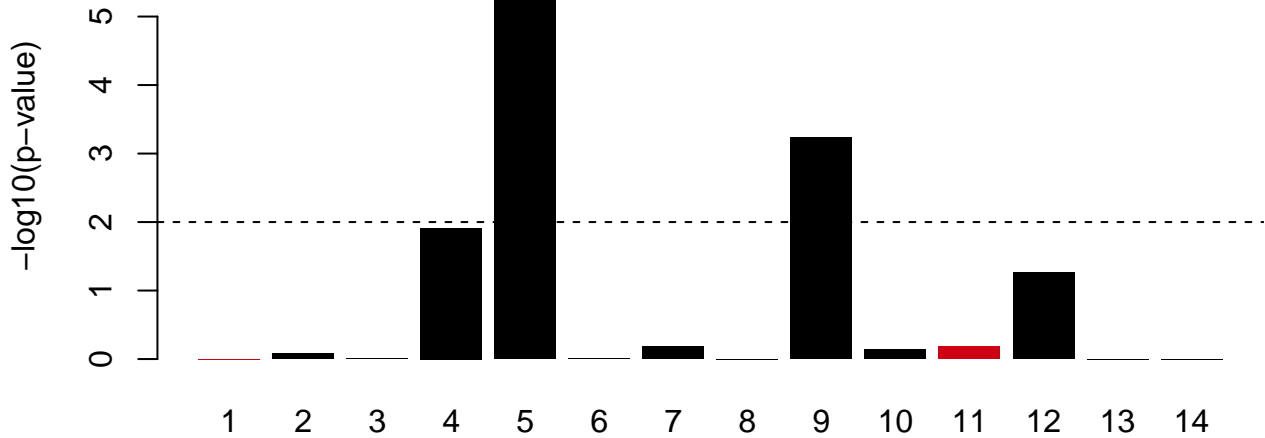

Supplement: supp [file naive.K4me3.positive.gene.pvalue.pdf › Source Data/Expression data/Fig6A/naive.K4me3.positive.gene.pvalue.pdf]

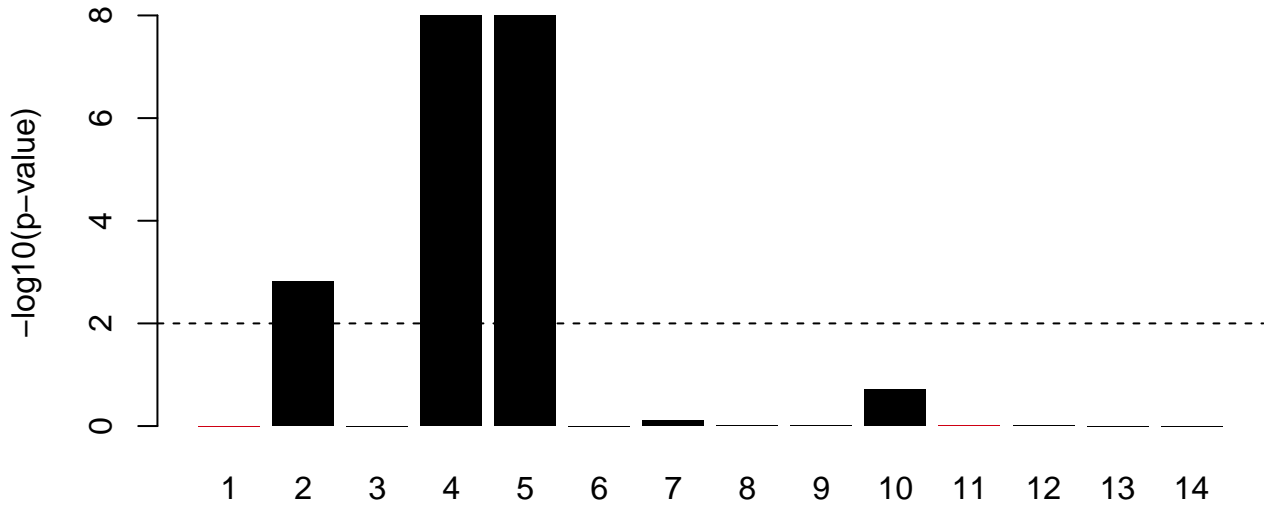

Supplement: supp [file naive.methylated.negative.gene.pvalue.pdf › Source Data/Expression data/Fig6A/naive.methylated.negative.gene.pvalue.pdf]

$-\log_{10}(\text{p-value})$

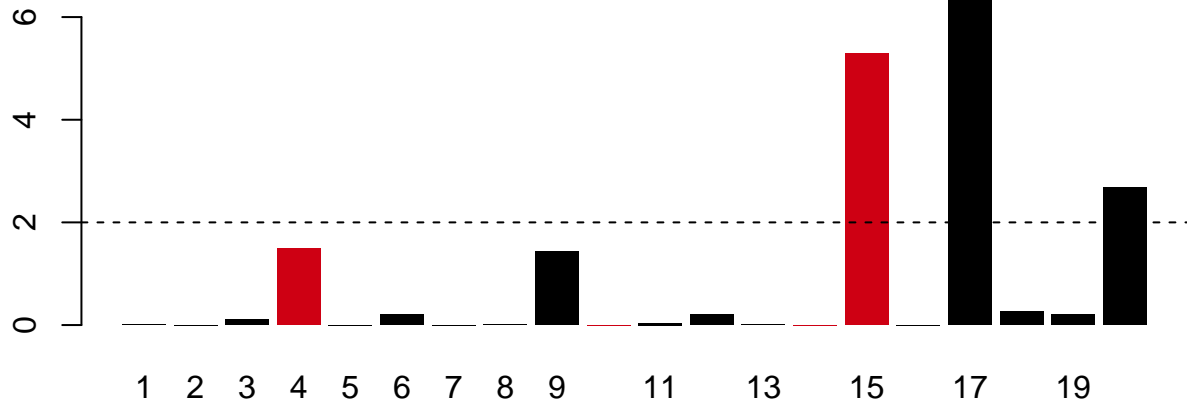

Supplement: supp [file naive.methylated.positive.gene.pvalue.pdf › Source Data/Expression data/Fig6A/naive.methylated.positive.gene.pvalue.pdf]

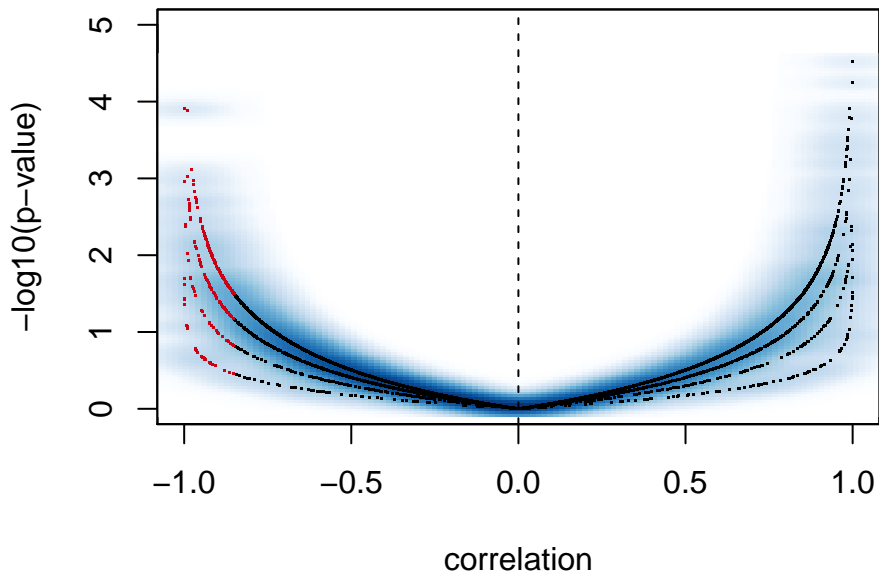

Supplement: supp [file naive.methylation.expression.correlation.pdf › Source Data/Expression data/Fig6A/naive.methylation.expression.correlation.pdf]
